# Supplementary material for: Efficient termination of nuclear lncRNA transcription promotes mitochondrial genome maintenance
Source: eLife. 2018 Mar 5;7:e31989. doi: 10.7554/eLife.31989 (PMC5837560; doi:10.7554/eLife.31989)
Supplement: Figure 3—source data 1. — CUT name and genomic coordinates are indicated. Distance and identifier of tandem downstream gene is given. NET-seq data inform on the directionality of the downstream gene promoters. The read-through index calculated from Pol II PAR-CLIP data following Nrd1 depletion is shown. Nrd1 and Nab3 PAR-CLIP data are given normalized to 4sU-seq data to quantify Nrd1 and Nab3 binding. [file elife-31989-fig3-data1.xlsx]

## Sheet: Sheet2
CUT info								Directionality of the downstream gene		Transcriptional readthrough	Nrd1 occupancy	Nab3 occupancy
CUT	Coordinates (sacCer3)					Downstream		NET-Seq (Marquardt et al., 2014)		PolII PAR-CLIP (Schaughency et al., 2014)	Nrd1 PAR-CLIP (4sU-Seq-norm.) (Schulz et al., 2013)	Nab3 PAR-CLIP (4sU-Seq-norm.) (Schulz et al., 2013)
name	chr	start	end	width	strand	gap_width	gene	coding TSS + 100 bp FW	divergent TSS - 100 bp REV	Readthrough index	Nrd1 binding sites	Nab3 binding sites
CUT003	chrI	143437	143597	161	+	108	YAL002W	104.5	1	1.11351	0.699978	0.457602
CUT007	chrII	191988	192340	353	+	109	YBL016W	126.5	0	1.32558	0.856984	0.69311
CUT023	chrII	381378	381642	265	+	386	YBR072W	30	0	2.60953	6.71975	2.47425
CUT036	chrII	707029	707317	289	+	209	YBR244W	136	1.5	0.984504	0.925104	0.667483
CUT048	chrIII	179038	179414	377	+	104	YCR032W	57.5	0	0.820194	0.0116313	0.0308793
CUT052	chrIV	192400	192568	169	+	180	YDL146W	28	0	1.0141	0	0
CUT059	chrIV	423723	424099	377	+	108	YDL017W	46.5	0.5	1.07026	0.0809973	0.0485849
CUT060	chrIV	442627	442843	217	+	184	YDL004W	133	0.5	1.18302	7.33142	4.76358
CUT091	chrIV	1302228	1302716	489	+	456	YDR419W	27	2.5	1.39435	1.39063	2.55399
CUT094	chrIV	1334212	1334580	369	+	239	YDR436W	14.5	0.5	1.34089	41.9236	27.3956
CUT095	chrIV	1359164	1359492	329	+	429	YDR450W	1396	1	1.76981	1.08645	0.810119
CUT150	chrVII	609799	609927	129	+	635	YGR060W	243	0	1.68365	11.4474	13.1679
CUT192	chrIX	249476	249699	224	+	290	YIL056W	90	0	0.734224	1.65099	0.823516
CUT196	chrX	31425	31825	401	+	336	YJL213W	88	1.5	0.991915	3.55129	5.94501
CUT217	chrX	585655	585911	257	+	155	YJR086W	77	6	1.26576	0.50572	0.900718
CUT241	chrXI	489897	490409	513	+	953	YKR027W	53	2	0.954153	8.88609	6.03079
CUT244	chrXI	581538	581850	313	+	431	YKR076W	5	0.5	1.03074	5.12321	12.9147
CUT277	chrXII	1028179	1028331	153	+	521	YLR448W	899.5	0.5	1.33762	5.24945	4.02772
CUT293	chrXIII	330450	330634	185	+	157	YMR030W	32.5	0.5	0.50838	2.57661	3.09035
CUT320	chrXIV	174890	175234	345	+	174	YNL250W	39.5	0	1.16521	7.00086	6.21065
CUT336	chrXIV	498842	499122	281	+	293	YNL067W-B	4.5	1	0.799759	1.40098	0.762676
CUT341	chrXIV	579035	579443	409	+	135	YNL027W	88.5	0	0.896409	0.94534	4.14821
CUT348	chrXIV	662194	662306	113	+	605	YNR017W	148.5	1	0.965319	9.14615	13.8778
CUT356	chrXV	128306	128498	193	+	737	YOL100W	41	0.5	0.867494	13.2781	6.20494
CUT361	chrXV	168330	168434	105	+	291	YOL082W	39.5	1.5	0.447157	0.434014	0.523024
CUT362	chrXV	170314	170786	473	+	282	YOL081W	37.5	1	0.815701	10.2625	11.7917
CUT365	chrXV	234611	234763	153	+	175	YOL051W	112.5	1	0.518947	0	0.999876
CUT379	chrXV	462632	463392	761	+	1075	YOR072W-B	0	0	0.754236	3.48465	1.26642
CUT381	chrXV	517113	517457	345	+	183	YOR104W	62	2.5	0.761301	0.453826	0.207497
CUT387	chrXV	661889	662169	281	+	230	YOR176W	76	2.5	1.34836	1.5057	1.47933
CUT391	chrXV	878093	878317	225	+	116	YOR299W	100.5	1.5	0.828557	0.199707	0.0523889
CUT433	chrXVI	822055	822167	113	+	451	YPR145W	644	0	2.30694	17.9029	57.7225
CUT440	chrI	67850	67962	113	-	329	YAL040C	110.5	0.5	0.746968	6.50056	3.21171
CUT441	chrI	151617	152033	417	-	450	YAL001C	93.5	1	1.32754	2.86726	1.18848
CUT452	chrII	406105	406457	353	-	853	YBR081C	63.5	0	1.03727	0.00804816	0.189618
CUT453	chrII	407905	408489	585	-	735	YBR082C	812	1	1.04463	4.98565	2.97303
CUT456	chrII	549130	549538	409	-	120	YBR154C	273.5	0	1.04853	1.61377	2.87411
CUT465	chrIII	147784	148080	297	-	149	YCR017C	104.5	4	1.36696	0.00150673	0.00436869
CUT474	chrIV	132316	132644	329	-	482	YDL183C	21.5	0	1.04878	0.370701	0.153979
CUT486	chrIV	345077	345445	369	-	123	YDL059C	18.5	6	0.788265	0.530405	0.525809
CUT488	chrIV	356909	357141	233	-	149	YDL055C	987.5	0	1.11605	9.8095	3.58083
CUT490	chrIV	407407	407591	185	-	200	YDL025C	51.5	0	0.854751	0.0263946	0.00499189
CUT498	chrIV	562512	562856	345	-	184	YDR054C	191.5	0	0.910568	6.51071	5.66259
CUT508	chrIV	750914	751346	433	-	171	YDR146C	132	0	0.944397	0.155738	0.325397
CUT509	chrIV	768106	768370	265	-	134	YDR153C	136.5	1	0.96401	0.130794	0.259338
CUT511	chrIV	781234	781354	121	-	133	YDR162C	36.5	2.5	1.23869	0.0232727	0.116083
CUT519	chrIV	1031732	1032100	369	-	312	YDR284C	52.5	1	0.897241	0.0663252	0.47972
CUT543	chrV	51773	51973	201	-	233	YEL055C	178	3	2.40436	0.200082	2.27052
CUT567	chrV	431225	431369	145	-	775	YER132C	37	0.5	0.626345	9.26397	3.3236
CUT589	chrVII	150665	150961	297	-	493	YGL187C	91.5	9.5	0.971131	0	0
CUT597	chrVII	345292	345724	433	-	138	YGL089C	5	6.5	1.04456	1.4758	1.88621
CUT606	chrVII	534995	535247	253	-	536	YGR027C	861	0.5	1.18266	0.251731	0.304623
CUT624	chrVII	823314	823489	176	-	298	YGR161C-D	0	0	0.760552	0	0
CUT632	chrVII	993729	994073	345	-	207	YGR250C	44.5	0	0.961293	7.89811	4.34022
CUT636	chrVII	1065047	1065167	121	-	106	YGR286C	107.5	0.5	0.708968	0.907669	1.05174
CUT672	chrX	96759	97505	747	-	229	YJL173C	72.5	2	3.64203	0.454564	0.375727
CUT680	chrX	172959	173063	105	-	591	YJL130C	153	0.5	0.766728	0.636505	1.76928
CUT717	chrXI	352851	353443	593	-	226	YKL046C	88	0	1.08597	0.0633246	0.408973
CUT727	chrXI	571070	571206	137	-	160	YKR068C	112.5	2.5	1.61588	16.3938	12.8893
CUT729	chrXI	614088	614696	609	-	202	YKR092C	230.5	1.5	1.26074	0.260797	0.322845
CUT741	chrXII	633619	634003	385	-	264	YLR247C	100	1	2.82798	2.93728	4.36308
CUT749	chrXII	822731	823316	586	-	138	YLR346C	15.5	0.5	0.871041	0.523234	1.8189
CUT772	chrXIII	431246	431454	209	-	150	YMR081C	8	7.5	0.758963	14.0433	5.97036
CUT774	chrXIII	448310	448958	649	-	223	YMR089C	87	2.5	1.30679	0.822929	0.777162
CUT831	chrXV	234191	234495	305	-	554	YOL052C	234.5	0.5	0.8287	1.26414	3.32481
CUT838	chrXV	391222	391342	121	-	146	YOR032C	3	2	0.913517	0.125186	0.00642149
CUT855	chrXV	741773	742245	473	-	203	YOR211C	96.5	0.5	0.694806	0.344949	1.76303
CUT887	chrXVI	187838	188062	225	-	112	YPL190C	290.5	0	0.930298	0.0891244	0
